# Supplementary material for: The Role of Campus Food Pantries in the Food Security Safety Net: On-Going or Emergency Use at a Midwest Campus Pantry
Source: MDPI journal article supplement (doi:10.3390/nu14224876), 2022-11-18
Supplement: s1 [file s1]

**Table S1.** Sociodemographic characteristics of food insecure students who reported using and not using the campus food pantry based on results from an online campus survey (n=888).

| Characteristic                           | Used<br>(n=12) | Did Not Use<br>(n=30) | p-Value <sup>a</sup> |
|------------------------------------------|----------------|-----------------------|----------------------|
| <i>Food Security Status, n (%)</i>       |                |                       | 0.495                |
| Episodic                                 | 5 (41.7)       | 16 (53.3)             |                      |
| Persistent                               | 7 (58.3)       | 14 (46.7)             |                      |
| <i>Classification, n (%)</i>             |                |                       | 0.032                |
| Undergraduate                            | 12 (100.0)     | 9 (30.0)              |                      |
| Graduate                                 | 0 (0.0)        | 21 (70.0)             |                      |
| <i>First Generation, n (%)</i>           | 6 (50.0)       | 10 (33.3)             |                      |
| <i>International Student, n (%)</i>      |                |                       | -                    |
| US Born                                  | 11 (91.7)      | 26 (86.7)             |                      |
| Foreign Born                             | 1 (8.3)        | 4 (13.3)              |                      |
| <i>Gender, n (%)</i>                     |                |                       | 0.841                |
| Female                                   | 5 (41.7)       | 15 (51.7)             |                      |
| Male                                     | 4 (33.3)       | 14 (48.3)             |                      |
| Unknown                                  | 3 (25.0)       | 1 (3.3)               |                      |
| <i>Race/Ethnicity, n (%)</i>             |                |                       | -                    |
| Asian/Pacific Islander <sup>d</sup>      | 1 (8.3)        | 8 (26.7)              |                      |
| Black                                    | 2 (16.7)       | 2 (6.67)              |                      |
| Hispanic/Latinx                          | 3 (25.0)       | 3 (10.0)              |                      |
| White                                    | 3 (25.0)       | 16 (53.3)             |                      |
| Unknown                                  | 1 (8.3)        | 1 (3.3)               |                      |
| <i>Housing, n (%)</i>                    |                |                       | -                    |
| At home with family                      | 2 (16.7)       | 3 (10.0)              |                      |
| Greek Life                               | 0 (0.0)        | 4 (13.3)              |                      |
| Dorm                                     | 3 (25.0)       | 8 (26.7)              |                      |
| Apartment/House with roommates or spouse | 7 (58.3)       | 15 (50.0)             |                      |
| <i>Age (years), n (%)</i>                |                |                       | -                    |
| ≤ 21                                     | 11 (91.7)      | 21 (70.0)             |                      |
| 22 +                                     | 1 (8.3)        | 9 (30.0)              |                      |
| <i>Financial Support, n (%)</i>          |                |                       |                      |
| Family                                   | 6 (50.0)       | 24 (80.0)             | 0.052                |
| Employment                               | 6 (50.0)       | 20 (66.7)             | 0.315                |
| Government                               | 8 (66.7)       | 8 (26.7)              | 0.016                |
| Scholarships                             | 9 (75.0)       | 12 (40.0)             | 0.040                |
| Loans                                    | 6 (50.0)       | 6 (20.0)              | 0.052                |
| Other                                    | 1 (8.3)        | 0 (0.0)               | -                    |
| <i>Meal Plan, n (%)</i>                  |                |                       | 0.083                |
| Has meal plan                            | 4 (33.3)       | 11 (36.7)             |                      |

<sup>a</sup> Pearson's chi-squared tests determined categorical associations by pantry use with significance set at P < 0.05. Responses less than 5 were not included in the analysis

**Table S2.** Satisfaction items and acceptability scale items were reported for college students that used a campus food pantry from August 2020 to May 2021 (n=267).

| Questions                                                                                     | N   | Mean (SD)  |
|-----------------------------------------------------------------------------------------------|-----|------------|
| Satisfaction <sup>a</sup>                                                                     |     |            |
| How satisfied were you with the variety of foods available?                                   | 267 | 4.5 (0.76) |
| How satisfied were you with the amount of healthy foods available?                            | 260 | 4.5 (0.75) |
| I received help promptly.                                                                     | 226 | 4.5 (0.94) |
| The operating hours are convenient for me.                                                    | 230 | 4.3 (1.1)  |
| Acceptability <sup>b</sup>                                                                    | 243 | 28.9 (2.0) |
| How easy was it to use the Food Assistance and Wellbeing Program?                             | 246 | 4.8 (0.40) |
| How helpful to you was the Food Assistance and Wellbeing Program?                             | 245 | 4.9 (0.41) |
| Was the amount of time it took to use the Food Assistance & Wellbeing Program acceptable?     | 246 | 4.8 (0.42) |
| How would you rate your overall satisfaction with the Food Assistance and Well-being Program? | 245 | 4.8 (0.45) |
| How much did you enjoy using the Food Assistance and Wellbeing Program?                       | 245 | 4.8 (0.49) |
| How easy was it to understand how to use the Food Assistance & Well-being Program?            | 246 | 4.8 (0.50) |

<sup>a</sup> Rated on a 5-point Likert scale, 1 being very dissatisfied and 5 being very satisfied

<sup>b</sup> Rated on a 5-point Likert scale, 1 being strongly disagreed and 5 being strongly agreed
